# Supplementary material for: Atherosclerotic plaques occur in absence of intima-media thickening in both systemic sclerosis and systemic lupus erythematosus: a duplexsonography study of carotid and femoral arteries and follow-up for cardiovascular events
Source: PubMed Central journal article supplement (PMC3978872; doi:10.1186/ar4489), 2014-02-19
Supplement: ar4489-S1.pdf [file ar4489-S1.pdf]

**Additional file 1: Correlation of carotid and femoral artery IMT with traditional and non-traditional risk factors for atherosclerosis**

| Variable                             | All patients (n=190) |         |                 |         | SSc (n=90)       |         |                 |         | SLE (n=100)     |         |                 |         |
|--------------------------------------|----------------------|---------|-----------------|---------|------------------|---------|-----------------|---------|-----------------|---------|-----------------|---------|
|                                      | mIMT CCA             |         | mIMT CFA        |         | mIMT CCA         |         | mIMT CFA        |         | mIMT CCA        |         | mIMT CFA        |         |
|                                      | correlation          | p-value | correlation     | p-value | correlation      | p-value | correlation     | p-value | correlation     | p-value | correlation     | p-value |
| Age, years                           | r=0.717              | <0.001  | r=0.581         | <0.001  | r=0.682          | <0.001  | r=0.565         | <0.001  | r=0.726         | <0.001  | r=0.560         | <0.001  |
| Age at diagnosis, years              | r=0.677              | <0.001  | r=0.538         | <0.001  | r=0.652          | <0.001  | r=0.586         | <0.001  | r=0.670         | <0.001  | r=0.437         | <0.001  |
| Sisease duration, months             | r=0.047              | 0.524   | r=0.046         | 0.443   | r=-0.030         | 0.782   | r=-0.109        | 0.308   | r=0.094         | 0.357   | r=0.217         | 0.032   |
| Male sex                             | r $\phi$ =-0.259     | <0.001  | r $\phi$ =0.272 | <0.001  | r $\phi$ =0.261  | 0.013   | r $\phi$ =0.341 | 0.001   | r $\phi$ =0.268 | 0.007   | r $\phi$ =0.208 | 0.039   |
| Postmenopausal status                | r=0.487              | <0.001  | r=0.389         | <0.001  | r=0.546          | 0.001   | r=0.375         | 0.001   | r=0.400         | <0.001  | r=0.373         | <0.001  |
| Body-mass index                      | r=0.170              | 0.023   | r=0.220         | 0.003   | r=0.128          | 0.241   | r=0.197         | 0.070   | r=0.258         | 0.012   | r=0.294         | 0.004   |
| Systolic blood pressure, mmHg        | r=0.314              | <0.001  | r=0.251         | 0.001   | r=0.303          | 0.007   | r=0.332         | 0.003   | r=0.346         | 0.001   | r=0.171         | 0.124   |
| Diastolic blood pressure, mmHg       | r=0.121              | 0.121   | r=0.064         | 0.424   | r=0.067          | 0.564   | r=0.128         | 0.266   | r=0.228         | 0.029   | r=0.024         | 0.833   |
| Triglyceride, mg/dl                  | r=-0.020             | 0.784   | r=0.087         | 0.236   | r=-0.137         | 0.199   | r=-0.040        | 0.706   | r=0.099         | 0.333   | r=0.235         | 0.021   |
| Total Cholesterol, mg/dl             | r=0.031              | 0.672   | r=-0.039        | 0.596   | r=0.035          | 0.743   | r=-0.052        | 0.628   | r=0.027         | 0.790   | r=-0.030        | 0.767   |
| Low density lipoprotein, mg/dl       | r=0.033              | 0.650   | r=0.033         | 0.658   | r=-0.008         | 0.940   | r=0.057         | 0.593   | r=0.065         | 0.523   | r=0.004         | 0.966   |
| High density lipoprotein, mg/dl      | r=-0.012             | 0.876   | r=-0.033        | 0.654   | r=0.049          | 0.652   | r=0.112         | 0.300   | r=-0.072        | 0.486   | r=-0.195        | 0.057   |
| Glomerular filtration rate           | r=-0.313             | <0.001  | r=-0.379        | <0.001  | r=-0.316         | 0.003   | r=-0.489        | <0.001  | r=-0.296        | 0.003   | r=-0.277        | 0.006   |
| Nicotine pack years                  | r=0.049              | 0.509   | r=0.154         | 0.036   | r=0.022          | 0.839   | r=0.320         | 0.002   | r=0.082         | 0.424   | r=-0.058        | 0.570   |
| Coronary heart disease               | r $\phi$ =0.211      | 0.004   | r $\phi$ =0.281 | <0.001  | r $\phi$ =0.160  | 0.133   | r $\phi$ =0.379 | <0.001  | r $\phi$ =0.265 | 0.008   | r $\phi$ =0.160 | 0.115   |
| Peripheral arterial vascular disease | r $\phi$ =0.043      | 0.560   | r $\phi$ =0.112 | 0.124   | r $\phi$ =-0.009 | 0.930   | r $\phi$ =0.117 | 0.270   | r $\phi$ =0.081 | 0.426   | r $\phi$ =0.060 | 0.557   |
| Pulmonary arterial hypertension      | r $\phi$ =0.188      | 0.010   | r $\phi$ =0.093 | 0.201   | r $\phi$ =0.140  | 0.189   | r $\phi$ =0.076 | 0.476   | r $\phi$ =0.172 | 0.088   | r $\phi$ =0.028 | 0.783   |
| Diabetes mellitus                    | r $\phi$ =0.044      | 0.552   | r $\phi$ =0.197 | 0.007   | r $\phi$ =0.023  | 0.832   | r $\phi$ =0.345 | 0.001   | r $\phi$ =0.080 | 0.434   | r $\phi$ =0.082 | 0.417   |
| SLEDAI                               | -                    | -       | -               | -       | -                | -       | -               | -       | r=-0.166        | 0.115   | r=-0.057        | 0.591   |
| SLICC                                | -                    | -       | -               | -       | -                | -       | -               | -       | r=0.208         | 0.049   | r=0.117         | 0.271   |
| mRSS                                 | -                    | -       | -               | -       | r=0.225          | 0.036   | r=-0.021        | 0.843   | -               | -       | -               | -       |

|                                   |                  |       |                  |       |                  |       |                  |       |                  |       |                  |       |
|-----------------------------------|------------------|-------|------------------|-------|------------------|-------|------------------|-------|------------------|-------|------------------|-------|
| C3, mg/dl                         | r=0.113          | 0.152 | r=0.074          | 0.351 | r=-0.032         | 0.787 | r=0.023          | 0.847 | r=0.159          | 0.142 | r=0.065          | 0.547 |
| C4, mg/dl                         | r=0.129          | 0.118 | r=0.055          | 0.512 | r=0.082          | 0.499 | r=0.168          | 0.162 | r=0.158          | 0.173 | r=-0.001         | 0.993 |
| CRP, mg/dl                        | r=0.097          | 0.233 | r=0.056          | 0.493 | r=0.019          | 0.873 | r=-0.096         | 0.427 | r=0.181          | 0.101 | r=0.174          | 0.116 |
| 5-yr daily dose of prednisone, mg | r=-0.103         | 0.172 | r=-0.045         | 0.553 | r=-0.074         | 0.498 | r=-0.041         | 0.709 | r=-0.150         | 0.154 | r=-0.065         | 0.539 |
| Duration of CS use, months        | r=0.039          | 0.600 | r=0.034          | 0.647 | r=0.028          | 0.794 | r=0.097          | 0.370 | r=0.035          | 0.733 | r=-0.058         | 0.576 |
| Cumulative CS dose, g             | r=-0.073         | 0.334 | r=0.005          | 0.945 | r=-0.042         | 0.699 | r=-0.044         | 0.688 | r=-0.110         | 0.296 | r=0.060          | 0.568 |
| Duration of HCQ use, months       | r=0.023          | 0.754 | r=-0.026         | 0.725 | r=0.045          | 0.672 | r=0.030          | 0.779 | r=0.107          | 0.295 | r=0.029          | 0.778 |
| Cumulative HCQ dose, g            | r=0.037          | 0.611 | r=-0.060         | 0.414 | r=0.045          | 0.671 | r=0.022          | 0.839 | r=0.124          | 0.225 | r=-0.031         | 0.761 |
| Duration of AZA use ,months       | r=-0.017         | 0.817 | r=0.037          | 0.611 | r=-0.040         | 0.709 | r=-0.029         | 0.788 | r=0.029          | 0.778 | r=0.095          | 0.354 |
| Cumulative AZA dose, g            | r=0.009          | 0.899 | r=0.015          | 0.843 | r=0.015          | 0.891 | r=-0.028         | 0.795 | r=0.041          | 0.688 | r=0.072          | 0.481 |
| Duration of CYP use, months       | r=-0.053         | 0.466 | r=0.003          | 0.972 | r=-0.121         | 0.256 | r=-0.107         | 0.315 | r=-0.028         | 0.787 | r=0.057          | 0.578 |
| Cumulative CYP dose, g            | r=-0.071         | 0.332 | r=-0.019         | 0.795 | r=-0.131         | 0.217 | r=-0.097         | 0.364 | r=-0.061         | 0.553 | r=0.013          | 0.903 |
| Antiphospholipid antibodies       | r $\phi$ =-0.054 | 0.458 | r $\phi$ =-0.121 | 0.097 | r $\phi$ =-0.118 | 0.270 | r $\phi$ =-0.168 | 0.113 | r $\phi$ =0.033  | 0.749 | r $\phi$ =-0.053 | 0.601 |
| ANA, current or former            | r $\phi$ =-0.038 | 0.599 | r $\phi$ =-0.035 | 0.632 | r $\phi$ =-0.035 | 0.740 | r $\phi$ =-0.041 | 0.704 | r $\phi$ =-0.066 | 0.517 | r $\phi$ =-0.055 | 0.588 |
| SSA-ab                            | r $\phi$ =-0.179 | 0.014 | r $\phi$ =-0.202 | 0.005 | r $\phi$ =-0.149 | 0.162 | r $\phi$ =-0.178 | 0.094 | r $\phi$ =-0.125 | 0.219 | r $\phi$ =-0.154 | 0.127 |
| SSB-ab                            | r $\phi$ =-0.065 | 0.372 | r $\phi$ =-0.155 | 0.033 | r $\phi$ =-0.054 | 0.611 | r $\phi$ =-0.094 | 0.377 | r $\phi$ =-0.008 | 0.938 | r $\phi$ =-0.151 | 0.136 |
| ssDNA-ab                          | r $\phi$ =-0.091 | 0.212 | r $\phi$ =-0.080 | 0.276 | -                | -     | -                | -     | r $\phi$ =0.014  | 0.893 | r $\phi$ =-0.019 | 0.850 |
| dsDNA-ab                          | r $\phi$ =-0.210 | 0.004 | r $\phi$ =-0.180 | 0.013 | -                | -     | -                | -     | r $\phi$ =-0.188 | 0.063 | r $\phi$ =-0.197 | 0.051 |
| SM-ab                             | r $\phi$ =-0.102 | 0.650 | r $\phi$ =-0.042 | 0.564 | -                | -     | -                | -     | r $\phi$ =-0.057 | 0.573 | r $\phi$ =-0.023 | 0.824 |
| Nukleosomes-ab                    | r $\phi$ =-0.215 | 0.003 | r $\phi$ =-0.141 | 0.052 | -                | -     | -                | -     | r $\phi$ =-0.231 | 0.021 | r $\phi$ =-0.123 | 0.224 |
| RNP-ab                            | r $\phi$ =-0.094 | 0.200 | r $\phi$ =-0.091 | 0.212 | -                | -     | -                | -     | r $\phi$ =-0.058 | 0.569 | r $\phi$ =-0.044 | 0.668 |
| Centromere-ab                     | r $\phi$ =0.154  | 0.034 | r $\phi$ =0.219  | 0.002 | r $\phi$ =0.165  | 0.119 | r $\phi$ =0.255  | 0.015 | -                | -     | -                | -     |
| SCL70-ab                          | r $\phi$ =-0.010 | 0.888 | r $\phi$ =-0.071 | 0.335 | r $\phi$ =-0.117 | 0.270 | r $\phi$ =-0.209 | 0.048 | -                | -     | -                | -     |

IMT = intima-media thickness, CCA = common carotid artery, CFA = common femoral artery, mRSS = modified Rodnan Skin Score, SLEDAI = Systemic Lupus Erythematosus Disease Activity Index, SLICC = Systemic Lupus International Collaborating Clinics damage index, CS = corticosteroid, HCQ = hydroxychloroquine, AZA = azathioprine, CYP = cyclophosphamid
