# Supplementary material for: Atherosclerotic plaques occur in absence of intima-media thickening in both systemic sclerosis and systemic lupus erythematosus: a duplexsonography study of carotid and femoral arteries and follow-up for cardiovascular events
Source: PubMed Central journal article supplement (PMC3978872; doi:10.1186/ar4489), 2014-02-19
Supplement: ar4489-S2.pdf [file ar4489-S2.pdf]

**Additional file 2: Explorative univariate analysis of potential risk factors between patients with or without atherosclerotic plaques**

| Characteristic                               | SLE and SSc (n=190)    |                          |         | SSc (n=90)            |                          |         | SLE (n=100)           |                          |         |
|----------------------------------------------|------------------------|--------------------------|---------|-----------------------|--------------------------|---------|-----------------------|--------------------------|---------|
|                                              | with Plaque<br>(n=108) | without Plaque<br>(n=82) | p-value | with Plaque<br>(n=59) | without Plaque<br>(n=31) | p-value | with Plaque<br>(n=49) | without Plaque<br>(n=51) | p-value |
| Age, years                                   | 61.0 ± 11.8            | 41.6 ± 12.6              | <0.001  | 63.9±12.0             | 45.9±10.9                | <0.001  | 57.7 ± 10.6           | 39.0 ± 13.0              | <0.001  |
| Male sex                                     | 21 (19,4%)             | 4 (4,9%)                 | 0.004   | 10 (16.9%)            | 2 (6.5%)                 | 0.206   | 11 (22.4%)            | 2 (3.9%)                 | 0.007   |
| Mean IMT CCA                                 | 0.79 ± 0.14            | 0.64 ± 0.08              | <0.001  | 0.81±0.15             | 0.66±0.09                | <0.001  | 0.77 ± 0.12           | 0.62 ±0.08               | <0.001  |
| Mean IMT CFA                                 | 0.82 ± 0.16            | 0.65 ± 0.11              | <0.001  | 0.85±0.17             | 0.65±0.12                | <0.001  | 0.78 ±0.15            | 0.65 ±0.11               | <0.001  |
| Postmenopausal status, women only            | 75/87 (86.2%)          | 28/78 (35.9%)            | <0.001  | 44/49 (89.8%)         | 12/29 (41.4%)            | <0.001  | 31/38 (81.6%)         | 16/49 (32.7%)            | <0.001  |
| Body-mass index                              | 25.1 ± 4.3             | 24.5 ± 4.6               | 0.377   | 24.9±4.2              | 23.6±3.7                 | 0.164   | 25.4 ± 4.4            | 25.1 ± 5.0               | 0.760   |
| Body-mass index > 30 (adipositas)            | 11 (10.2%)             | 9 (11.0%)                | 0.860   | 5 (8.5)               | 1 (3.2%)                 | 0.660   | 6 (12.2%)             | 8 (15.7%)                | 0.620   |
| Hypertension                                 | 77 (71.3%)             | 24 (29.3%)               | <0.001  | 38 (64.4%)            | 7 (22.6%)                | <0.001  | 39 (79.6%)            | 17 (33.3%)               | <0.001  |
| - systolic blood pressure, mmHg              | 137.2 ± 21.6           | 120.1 ± 19.3             | <0.001  | 136.0±22.9            | 116.3±17.9               | <0.001  | 138.6±20.1            | 122.3 ±20.0              | <0.001  |
| - diastolic blood pressure, mmHg             | 78.8 ± 10.5            | 73.8 ± 11.2              | 0.005   | 77.9±11.7             | 71.5±9.7                 | 0.024   | 79.9 ± 8.6            | 75.2 ± 11.9              | 0.045   |
| - median number of antihypertensives (range) | 1 (6)                  | 0 (3)                    | <0.001  | 1 (4)                 | 0 (2)                    | 0.001   | 1 (6)                 | 0 (3)                    | <0.001  |
| Smoking, current or former                   | 56 (51.9%)             | 40 (48.8%)               | 0.675   | 29 (49.2%)            | 14 (45.2%)               | 0.719   | 27 (55.1%)            | 26 (51%)                 | 0.860   |
| - nicotine pack years                        | 14.3 ± 21.6            | 5.4 ± 8.5                | <0.001  | 13.9±22.5             | 4.1±7.8                  | 0.003   | 14.7 ±20.6            | 6.2 ± 8.9                | 0.009   |
| Diabetes                                     | 8 (7.4%)               | 2 (2.2%)                 | 0.192   | 4 (6.8%)              | 0 (0%)                   | 0.294   | 4 (8.2%)              | 2 (3.9%)                 | 0.432   |
| Dyslipidemia                                 | 54 (50%)               | 22 (26.5%)               | <0.001  | 30 (50.8%)            | 7 (22.6%)                | 0.010   | 24 (49%)              | 15 (29.4%)               | 0.045   |
| Triglyceride, mg/dl                          | 137.8 ± 81,5           | 127.5 ± 71.5             | 0.367   | 142.4±92.8            | 133.1±68.6               | 0.625   | 132.4±66.4            | 123,9±73.8               | 0.551   |
| Total Cholesterol, mg/dl                     | 217.6 ± 52.0           | 211.8 ± 59.3             | 0.476   | 216.1±55.5            | 217.4±38.8               | 0.909   | 219.5±47.9            | 208.4±69.2               | 0.357   |
| - Low density lipoprotein, mg/dl             | 127.0 ± 41.3           | 120.1 ± 45.7             | 0.281   | 125.2±42.9            | 126.0±31.7               | 0.934   | 129.0±39.6            | 116.4±52.6               | 0.182   |
| - High density lipoprotein, mg/dl            | 64.2 ± 17.7            | 63.9 ± 19.0              | 0.927   | 63.2±18.2             | 64.8±19.9                | 0.701   | 65.4±17.3             | 63.4±18.6                | 0.585   |
| Family history cardiovascular events         | 15 (13.9%)             | 13 (15.9%)               | 0.705   | 7 (11.9%)             | 5 (16.1%)                | 0.572   | 8 (16.3%)             | 8 (15.7%)                | 0.930   |
| Age at diagnosis, years                      | 53.7 ± 14.5            | 35.4 ± 11.4              | <0.001  | 56.0 ± 14.3           | 38.7 ± 10.9              | <0.001  | 50.8 ± 14.4           | 33.4 ± 11.4              | <0.001  |

|                                          |              |              |         |              |              |        |              |              |       |
|------------------------------------------|--------------|--------------|---------|--------------|--------------|--------|--------------|--------------|-------|
| Disease duration since diagnosis, months | 83.3 ± 93.7  | 68.6 ± 94.2  | 0.287   | 87.9 ± 95.2  | 79.4 ± 98.7  | 0.689  | 77.6 ± 92.5  | 62.1 ± 91.7  | 0.403 |
| Raynaud phenomenon                       | 76 (70.4%)   | 47 (57.3%)   | 0.062   | 55 (93.2%)   | 29 (93.5%)   | 1.000  | 21 (42.9%)   | 18 (35.3%)   | 0.438 |
| Pulmonary hypertension                   | 18 (16.7%)   | 2 (2.4%)     | <0.001  | 15 (25.4%)   | 2 (6.5%)     | 0.045  | 3 (6.1%)     | 0 (0%)       | 0.114 |
| Coronary heart disease                   | 17 (15.7%)   | 2 (2.4%)     | 0.003   | 8 (13.6%)    | 2 (6.5%)     | 0.484  | 9 (18.4%)    | 0 (0%)       | 0.001 |
| Peripheral arterial vascular disease     | 6 (5.6%)     | 1 (1.2%)     | 0.143   | 4 (6.8%)     | 1 (3.2%)     | 0.656  | 2 (4.1%)     | 0 (0%)       | 0.238 |
| Glomerular filtration rate               | 86.8 ± 21.2  | 100.8 ± 20.8 | <0.001  | 85.1 ± 19.7  | 101.3 ± 13.4 | <0.001 | 89.0 ± 23.1  | 100.6 ± 24.3 | 0.019 |
| C3, mg/dl                                | 114,2 ± 25,9 | 106,3 ± 35,5 | 0.104   | 117.8 ± 19.5 | 113.4 ± 24.1 | 0.387  | 109.8 ± 31.5 | 102.2 ± 40.3 | 0.329 |
| C4, mg/dl                                | 23.7 ± 17.6  | 19.4 ± 7.5   | 0.065   | 23.3 ± 6.9   | 21.8 ± 7.0   | 0.351  | 24.1 ± 25.4  | 17.9 ± 7.5   | 0.141 |
| CRP, mg/dl                               | 1.0 ± 2.0    | 0.8 ± 1.4    | 0.516   | 0.7 ± 0.8    | 0.7 ± 1.0    | 0.778  | 1.4 ± 2.8    | 0.9 ± 1.6    | 0.295 |
| median mRSS (range)                      | -            | -            | -       | 9 (43)       | 9 (40)       | 0.865  | -            | -            | -     |
| median SLEDAI (range)                    | -            | -            | -       | -            | -            | -      | 8 (26)       | 10 (60)      | 0.813 |
| median SLICC (range)                     | -            | -            | -       | -            | -            | -      | 3 (7)        | 2 (8)        | 0.070 |
| Autoantibodies:                          |              |              |         |              |              |        |              |              |       |
| - ANA, current or former                 | 101 (93.5%)  | 78 (95.1%)   | 0.760   | 56 (94.9%)   | 30 (96.8%)   | 1.000  | 45 (91.8%)   | 48 (94.1%)   | 0.712 |
| - SSA                                    | 26 (24.1%)   | 18 (22%)     | 0.731   | 8 (13.6%)    | 2 (6.5%)     | 0.484  | 18 (36.7%)   | 16 (31.4%)   | 0.571 |
| - SSB                                    | 7 (6.5%)     | 8 (9.8%)     | 0.407   | 1 (1.7%)     | 0 (0%)       | 1.000  | 6 (12.2%)    | 8 (15.7%)    | 0.620 |
| - ssDNA                                  | 14 (13%)     | 22 (26.8%)   | 0.016   | 4 (6.8%)     | 3 (9.7%)     | 0.688  | 10 (20.4%)   | 19 (37.3%)   | 0.063 |
| - dsDNA                                  | 14 (13%)     | 29 (35.4%)   | < 0.001 | 3 (5.1%)     | 2 (6.5%)     | 1.000  | 11 (22.4%)   | 27 (52.9%)   | 0.002 |
| - SM                                     | 3 (2.8%)     | 4 (4.9%)     | 0.467   | 1 (1.7%)     | 0 (0%)       | 1.000  | 2 (4.1%)     | 4 (7.8%)     | 0.678 |
| - Nukleosomes                            | 7 (6.5%)     | 15 (18.3%)   | 0.012   | 0 (0%)       | 0 (0%)       | -      | 7 (14.3%)    | 15 (29.4%)   | 0.068 |
| - RNP                                    | 6 (5.6%)     | 11 (13.4%)   | 0.060   | 2 (3.4%)     | 0 (0%)       | 0.543  | 4 (8.2%)     | 11 (21.6%)   | 0.092 |
| - SCL70                                  | 12 (11.1%)   | 15 (18.3%)   | 0.160   | 12 (20.3%)   | 14 (45.2%)   | 0.014  | 0 (0%)       | 1 (2%)       | 1.000 |
| - Centromere                             | 29 (26.9%)   | 11 (13.4%)   | 0.024   | 28 (47.5%)   | 8 (25.8%)    | 0.046  | 1 (2%)       | 3 (5.9%)     | 0.618 |
| - PMScl                                  | 2 (1.9%)     | 2 (2.4%)     | 1.000   | 1 (1.7%)     | 2 (6.5%)     | 0.272  | 1 (2%)       | 0 (0%)       | 0.490 |
| - U1RNP                                  | 0 (0%)       | 1 (1.2%)     | 0.432   | 0            | 1 (3.2%)     | 0.244  | 0 (0%)       | 0 (0%)       | -     |

|                                              |                  |                   |       |                 |                 |       |                   |                   |       |
|----------------------------------------------|------------------|-------------------|-------|-----------------|-----------------|-------|-------------------|-------------------|-------|
| - C1q                                        | 6 (5.6%)         | 6 (7.3%)          | 0.621 | 3 (5.1%)        | 2 (6.5%)        | 1.000 | 3 (6.1%)          | 4 (7.8%)          | 1.000 |
| - RIB-PP                                     | 0 (0%)           | 3 (3.7%)          | 0.079 | 0 (0%)          | 0 (0%)          | -     | 0 (0%)            | 3 (5.9%)          | 0.243 |
| Antiphospholipid antibodies                  | 10 (9.3%)        | 9 (11%)           | 0.696 | 3 (5.1%)        | 2 (6.5%)        | 1.000 | 7 (14.3%)         | 7 (13.7%)         | 1.000 |
| - $\beta$ 2-Glycoprotein I IgG               | 0%               | 4 (4.9%)          | 0.033 | 0 (0%)          | 2 (6.5%)        | 0.116 | 0 (0%)            | 2 (3.9%)          | 0.495 |
| - $\beta$ 2-Glycoprotein I IgM               | 7 (6.5%)         | 4 (4.9%)          | 0.639 | 3 (5.1%)        | 0 (0%)          | 0.549 | 4 (8.2%)          | 4 (7.8%)          | 1.000 |
| - Cardiolipin IgG                            | 1 (0.9%)         | 3 (3.7%)          | 0.317 | 0 (0%)          | 1 (3.2%)        | 0.244 | 1 (2.0%)          | 2 (3.9%)          | 1.000 |
| - Cardiolipin IgM                            | 3 (2.8%)         | 4 (4.9%)          | 0.467 | 2 (3.4%)        | 0 (0%)          | 0.543 | 1 (2.0%)          | 4 (7.8%)          | 0.363 |
| - Lupus anticoagulans                        | 3 (2.8%)         | 1 (1.2%)          | 0.635 | 0 (0%)          | 0 (0%)          | -     | 3 (6.1%)          | 1 (2.0%)          | 0.357 |
| corticosteroid use, current or former        | 57 (52.8%)       | 48 (58.5%)        | .0429 | 28 (47.5%)      | 15 (48.4%)      | 0.933 | 33 (64.7%)        | 29 (59.2%)        | 0.570 |
| - 5-yr daily dose of prednisone, mg          | 1.9 $\pm$ 3.2    | 1.4 $\pm$ 2.6     | 0.324 | 2.1 $\pm$ 3.2   | 1.1 $\pm$ 2.4   | 0.100 | 1.6 $\pm$ 3.3     | 1.6 $\pm$ 2.7     | 0.885 |
| - duration of corticosteroid use, months     | 31.8 $\pm$ 53.8  | 20.9 $\pm$ 49.0   | 0.157 | 37.2 $\pm$ 61.6 | 13.1 $\pm$ 29.8 | 0.016 | 25.1 $\pm$ 41.8   | 25.4 $\pm$ 57.0   | 0.978 |
| - cumulative corticosteroid dose, g          | 7.8 $\pm$ 15.6   | 4.0 $\pm$ 8.0     | 0.037 | 8.0 $\pm$ 14.8  | 2.7 $\pm$ 7.5   | 0.030 | 7.5 $\pm$ 16.9    | 4.8 $\pm$ 8.3     | 0.335 |
| hydroxychloroquine use, current or former    | 26 (24.1%)       | 26 (31.7%)        | 0.242 | 5 (8.5%)        | 4 (12.9%)       | 0.489 | 21 (42.9%)        | 22 (43.1%)        | 0.977 |
| - duration of hydroxychloroquine use, months | 7.2 $\pm$ 26.3   | 12.9 $\pm$ 39.9   | 0.237 | 1.7 $\pm$ 10.4  | 1.0 $\pm$ 4.3   | 0.750 | 14.0 $\pm$ 36.6   | 20.1 $\pm$ 49.2   | 0.485 |
| - cumulative hydroxychloroquine dose, g      | 59.9 $\pm$ 249.5 | 105.3 $\pm$ 320.4 | 0.275 | 14.5 $\pm$ 93.8 | 11.5 $\pm$ 51.6 | 0.870 | 115.8 $\pm$ 351.1 | 162.4 $\pm$ 394.8 | 0.538 |
| azathioprine use, current or former          | 32 (29.6%)       | 20 (24.4%)        | 0.422 | 14 (23.7%)      | 5 (16.1%)       | 0.588 | 18 (36.7%)        | 15 (29.4%)        | 0.436 |
| - duration of azathioprine use, months       | 15.4 $\pm$ 40.1  | 7.8 $\pm$ 26.0    | 0.124 | 10.0 $\pm$ 29.6 | 7.9 $\pm$ 27.7  | 0.747 | 21.8 $\pm$ 50.5   | 7.7 $\pm$ 25.2    | 0.086 |
| - cumulative azathioprine dose, g            | 54.3 $\pm$ 177.6 | 24.6 $\pm$ 80.4   | 0.127 | 29.4 $\pm$ 83.0 | 23.7 $\pm$ 83.0 | 0.763 | 83.9 $\pm$ 244.6  | 25.1 $\pm$ 79.6   | 0.115 |
| cyclophosphamid use, current or former       | 10 (9.3%)        | 12 (14.6%)        | 0.251 | 2 (3.4%)        | 2 (6.5%)        | 0.606 | 8 (16.3%)         | 10 (19.6%)        | 0.669 |
| - duration of cyclophosphamid use, months    | 1.5 $\pm$ 10.9   | 2.3 $\pm$ 11.9    | 0.620 | 0.2 $\pm$ 0.9   | 0.6 $\pm$ 2.5   | 0.334 | 3.0 $\pm$ 16.1    | 3.2 $\pm$ 14.9    | 0.934 |
| - cumulative cyclophosphamid dose, g         | 2.0 $\pm$ 16.0   | 1.0 $\pm$ 4.5     | 0.607 | 0.1 $\pm$ 0.6   | 0.8 $\pm$ 3.6   | 0.334 | 4.2 $\pm$ 23.6    | 1.2 $\pm$ 5.1     | 0.386 |

Values are number of patients (percentage) and mean  $\pm$  SD (if not other stated).

mRSS = modified Rodnan Skin Score, SLEDAI = Systemic Lupus Erythematosus Disease Activity Index, SLICC = Systemic Lupus International Collaborating Clinics damage index
