# Supplementary material for: Atherosclerotic plaques occur in absence of intima-media thickening in both systemic sclerosis and systemic lupus erythematosus: a duplexsonography study of carotid and femoral arteries and follow-up for cardiovascular events
Source: PubMed Central journal article supplement (PMC3978872; doi:10.1186/ar4489), 2014-02-19
Supplement: ar4489-S3.pdf [file ar4489-S3.pdf]

### Additional file 3

#### Explorative analysis of potential predictors of cardiovascular events during follow-up in SSc and SLE patients

| SSc and SLE (n = 129)                       |                  |                                     |         |
|---------------------------------------------|------------------|-------------------------------------|---------|
| Variable                                    | beta coefficient | unadjusted hazard ratio<br>(95% CI) | p-value |
| SSc vs SLE                                  | -0.173           | 0.84 (0.33-2.10)                    | 0.712   |
| Age (per 5 years)                           | 0.262            | 1.30 (1.10-1.54)                    | 0.003   |
| Male sex                                    | 2.833            | 17.00 (5.99-48.22)                  | <0.001  |
| Carotid (CP) and femoral artery plaque (FP) |                  |                                     |         |
| - group 3 (CP & FP) vs group 1 (no plaque)  | 2.595            | 13.40 (2.99-59.95)                  | <0.001  |
| - group 3 (CP & FP) vs group 2 (CP or FP)   | 2.672            | 14.47 (2.51-83.55)                  | 0.003   |
| - group 2 (CP or FP) vs group 1 (no plaque) | -0.077           | 0.93 (0.12-7.39)                    | 0.942   |
| Postmenopausal status, women only           | 1.576            | 4.83 (0.61-38.22)                   | 0.135   |
| Body-mass index (BMI)                       | 0.063            | 1.07 (0.96-1.19)                    | 0.253   |
| Adipositas (BMI > 30)                       | 0.517            | 1.68 (0.47-5.97)                    | 0.425   |
| Arterial hypertension                       | 1.678            | 5.35 (1.91-15.02)                   | <0.001  |
| Nicotine use (per 5 pack-years)             | 0.143            | 1.15 (1.04-1.28)                    | 0.005   |
| Pulmonary hypertension                      | 0.124            | 1.13 (0.26-4.96)                    | 0.869   |
| Coronary heart disease                      | 2.592            | 13.36 (4.67-38.20)                  | <0.001  |
| Peripheral arterial vascular disease        | 0.983            | 2.67 (0.60-11.86)                   | 0.196   |
| Diabetes                                    | -0.477           | 0.62 (0.29-1.32)                    | 0.217   |
| Dyslipidemia                                | 0.484            | 1.16 (0.45-2.98)                    | 0.766   |
| Family history cardiovascular events        | 0.081            | 1.08 (0.31-3.80)                    | 0.900   |
| Age at diagnosis (per 5 years)              | 0.075            | 1.20 (1.04-1.39)                    | 0.014   |
| Disease duration (per 5 years)              | 0.109            | 1.11 (0.89-1.39)                    | 0.334   |
| GFR (Mayo, per 10 units)                    | -0.041           | 0.96 (0.77-1.20)                    | 0.960   |
| C3 (per mg/dl)                              | 0.010            | 1.01 (0.99-1.03)                    | 0.306   |
| C4 (per mg/dl)                              | -0.027           | 0.97 (0.91-1.05)                    | 0.474   |
| CRP (per mg/dl)                             | 0.220            | 1.25 (0.98-1.59)                    | 0.079   |

CP = carotid artery plaque; FP = femoral artery plaque; GFR = glomerular filtration rate

#### Multivariate Cox regression analysis of predictors of incident cardiovascular events during follow-up in SSc and SLE patients (if only carotid artery duplexsonography was performed and status of femoral artery plaque would have been unknown)

| Cox model (only carotid artery plaque) – SSc and SLE (n = 129)* |                  |                                |         |
|-----------------------------------------------------------------|------------------|--------------------------------|---------|
| Variable                                                        | beta coefficient | adjusted hazard ratio (95% CI) | p-value |
| Coronary heart disease                                          | 2.576            | 13.14 (3.96-43.64)             | <0.001  |
| Male sex                                                        | 2.523            | 12.47 (3.96-39.27)             | <0.001  |
| Carotid plaque (yes vs no)                                      | 1.260            | 3.53 (0.97-12.87)              | 0.057   |

\* 0 observations excluded from model because of missing values. Events per variable: 19/3 = 6.33
